# Supplementary material
Source: Springer Nature journal article supplement (https://www.springermedizin.de/resource/supplementary/12936_2013_3689_MOESM1_ESM.pdf/9546126)

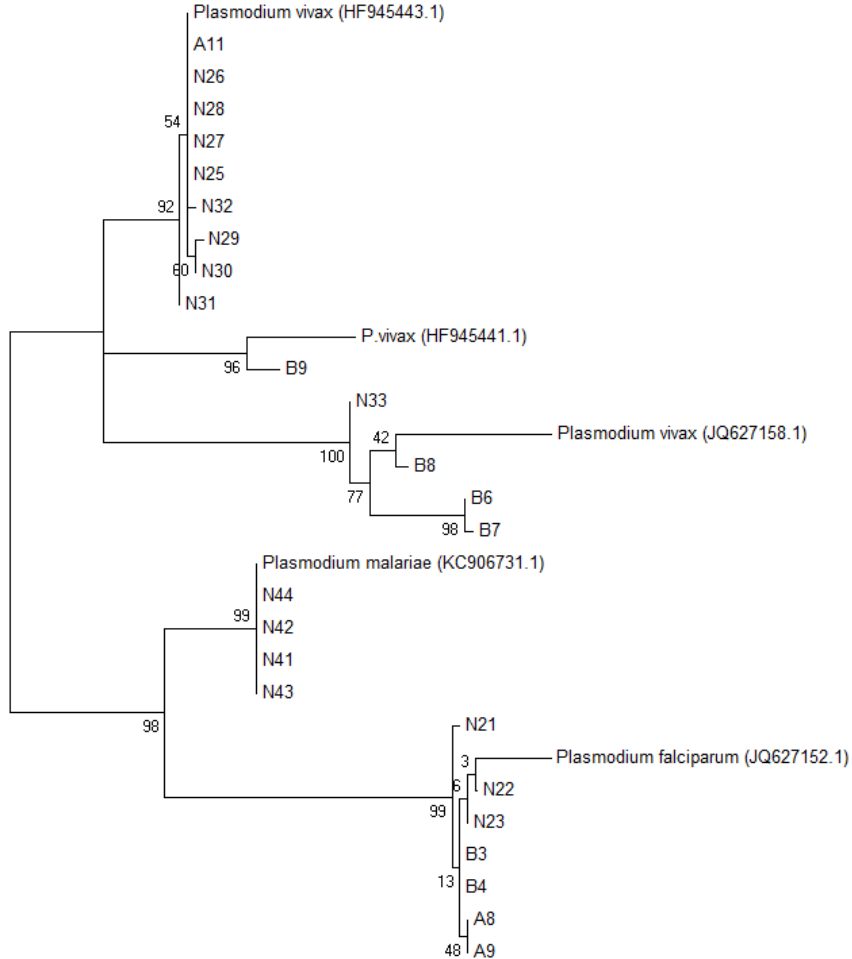

0.1

Supplement: MOESM1 [file 9546126]
